# Supplementary material for: Swarm: robust and fast clustering method for amplicon-based studies
Source: PubMed Central journal article supplement (PMC4178461; doi:10.7717/peerj.593), 2014-09-25
Supplement: peerj-02-593-s002.pdf [file peerj-02-593-s002.pdf]

| Domain                                    | Genome Name                                           | Genome Size (bp)                              | Phylum           | Class               |              |
|-------------------------------------------|-------------------------------------------------------|-----------------------------------------------|------------------|---------------------|--------------|
| Bacteria                                  | <i>Acidobacterium capsulatum</i> ATCC 51196           | 4,127,356                                     | Acidobacteria    | Acidobacteriae      |              |
|                                           | <i>Akkermansia muciniphila</i> ATCC BAA-835           | 2,664,102                                     | Verrucomicrobia  | Verrucomicrobiae    |              |
|                                           | <i>Anaerocellum thermophilum</i> Z-1320, DSM 6725     | 2,919,718                                     | Firmicutes       | Clostridia          |              |
|                                           | <i>Bacteroides thetaiotaomicron</i> VPI-5482          | 6,293,399                                     | Bacteroidetes    | Bacteroidia         |              |
|                                           | <i>Bacteroides vulgatus</i> ATCC 8482                 | 5,163,189                                     | Bacteroidetes    | Bacteroidia         |              |
|                                           | <i>Bordetella bronchiseptica</i> RB50                 | 5,339,179                                     | Proteobacteria   | Betaproteobacteria  |              |
|                                           | <i>Burkholderia xenovorans</i> LB400                  | 973,113                                       | Proteobacteria   | Betaproteobacteria  |              |
|                                           | <i>Caldicellulosiruptor saccharolyticus</i> DSM 8903  | 2,970,275                                     | Firmicutes       | Clostridia          |              |
|                                           | <i>Chlorobaculum tepidum</i> TLS                      | 2,154,946                                     | Chlorobi         | Chlorobia           |              |
|                                           | <i>Chlorobium limicola</i> DSM 245                    | 2,763,181                                     | Chlorobi         | Chlorobia           |              |
|                                           | <i>Chlorobium phaeobacteroides</i> DSM 266            | 3,133,902                                     | Chlorobi         | Chlorobia           |              |
|                                           | <i>Chlorobium phaeovibrioides</i> DSM 265             | 1,966,858                                     | Chlorobi         | Chlorobia           |              |
|                                           | <i>Chloroflexus aurantiacus</i> J-10-fl               | 5,258,541                                     | Chloroflexi      | Chloroflexi         |              |
|                                           | <i>Clostridium thermocellum</i> ATCC 27405            | 3,843,301                                     | Firmicutes       | Clostridia          |              |
|                                           | <i>Deinococcus radiodurans</i> R1                     | 3,284,156                                     | Thermi           | Deinococci          |              |
|                                           | <i>Desulfovibrio desulfuricans</i> ATCC 27774         | 2,873,437                                     | Proteobacteria   | Deltaproteobacteria |              |
|                                           | <i>Desulfovibrio piger</i> ATCC 29098                 | 2,826,240                                     | Proteobacteria   | Deltaproteobacteria |              |
|                                           | <i>Dictyoglomus turgidum</i> DSM 6724                 | 1,855,560                                     | Dictyoglomi      | Dictyoglonia        |              |
|                                           | <i>Enterococcus faecalis</i> V583                     | 3,359,974                                     | Firmicutes       | Bacilli             |              |
|                                           | <i>Fusobacterium nucleatum</i> ATCC 25586             | 2,174,500                                     | Fusobacteria     | Fusobacteria        |              |
|                                           | <i>Gemmatimonas aurantiaca</i> T-27T                  | 4,636,964                                     | Gemmatimonadetes | Gemmatimonadetes    |              |
|                                           | <i>Herpetosiphon aurantiacus</i> ATCC 23779           | 6,785,430                                     | Chloroflexi      | Chloroflexi         |              |
|                                           | <i>Hydrogenobaculum</i> sp. Y04AAS1                   | 1,559,514                                     | Aquificae        | Aquificae           |              |
|                                           | <i>Leptothrix cholodnii</i> SP-6                      | 4,909,403                                     | Proteobacteria   | Betaproteobacteria  |              |
|                                           | <i>Nitrosomonas europaea</i> ATCC 19718               | 2,812,094                                     | Proteobacteria   | Betaproteobacteria  |              |
|                                           | <i>Nostoc</i> sp. PCC 7120                            | 7,211,789                                     | Cyanobacteria    | unclassified        |              |
|                                           | <i>Pelodictyon phaeoclathratiforme</i> BU-1           | 3,018,238                                     | Chlorobi         | Chlorobia           |              |
|                                           | <i>Persephonella marina</i> EX-H1                     | 2,467,104                                     | Aquificae        | Aquificae           |              |
|                                           | <i>Porphyromonas gingivalis</i> ATCC 33277            | 2,354,886                                     | Bacteroidetes    | Bacteroidia         |              |
|                                           | <i>Rhodopirellula baltica</i> SH 1                    | 7,145,576                                     | Planctomycetes   | Planctomycetacia    |              |
|                                           | <i>Rhodospirillum rubrum</i> ATCC 11170               | 4,406,557                                     | Proteobacteria   | Alphaproteobacteria |              |
|                                           | <i>Ruegeria pomeroyi</i> DSS-3                        | 4,601,053                                     | Proteobacteria   | Alphaproteobacteria |              |
|                                           | <i>Salinispora arenicola</i> CNS-205                  | 5,786,361                                     | Actinobacteria   | Actinobacteria      |              |
|                                           | <i>Salinispora tropica</i> CNB-440                    | 5,183,331                                     | Actinobacteria   | Actinobacteria      |              |
|                                           | <i>Shewanella baltica</i> OS185                       | 5,312,910                                     | Proteobacteria   | Gammaproteobacteria |              |
|                                           | <i>Shewanella baltica</i> OS223                       | 5,358,884                                     | Proteobacteria   | Gammaproteobacteria |              |
|                                           | <i>Sulfitobacter</i> sp. EE-36                        | 3,547,243                                     | Proteobacteria   | Alphaproteobacteria |              |
|                                           | <i>Sulfitobacter</i> sp. NAS-14.1                     | 4,002,069                                     | Proteobacteria   | Alphaproteobacteria |              |
|                                           | <i>Sulfurihydrogenibium</i> sp. YO3AOP1               | 1,838,442                                     | Aquificae        | Aquificae           |              |
|                                           | <i>Sulfurihydrogenibium yellowstonense</i> SS-5       | 1,534,471                                     | Aquificae        | Aquificae           |              |
|                                           | <i>Thermoanaerobacter pseudethanolicus</i> ATCC 33223 | 2,362,816                                     | Firmicutes       | Clostridia          |              |
|                                           | <i>Thermotoga neapolitana</i> DSM 4359                | 1,884,562                                     | Thermotogae      | Thermotogae         |              |
|                                           | <i>Thermotoga petrophila</i> RKU-1                    | 1,824,357                                     | Thermotogae      | Thermotogae         |              |
|                                           | <i>Thermotoga</i> sp. RQ2                             | 877,693                                       | Thermotogae      | Thermotogae         |              |
|                                           | <i>Thermus thermophilus</i> HB8                       | 2,116,056                                     | Thermi           | Thermi              |              |
|                                           | <i>Treponema denticola</i> ATCC 35405                 | 2,843,201                                     | Spirochaetes     | Spirochaetes        |              |
|                                           | <i>Zymomonas mobilis</i> ZM4                          | 2,223,497                                     | Proteobacteria   | Alphaproteobacteria |              |
|                                           | Archaea                                               | <i>Archaeoglobus fulgidus</i> DSM 4304        | 2,178,400        | Euryarchaeota       | Archaeoglobi |
|                                           |                                                       | <i>Ignicoccus hospitalis</i> KIN4/I           | 1,297,538        | Crenarchaeota       | Thermoprotei |
|                                           |                                                       | <i>Methanocaldococcus jannaschii</i> DSM 2661 | 1,664,970        | Euryarchaeota       | Methanococci |
| <i>Methanococcus maripaludis</i> C5       |                                                       | 1,780,761                                     | Euryarchaeota    | Methanococci        |              |
| <i>Methanococcus maripaludis</i> S2       |                                                       | 1,661,137                                     | Euryarchaeota    | Methanococci        |              |
| <i>Nanoarchaeum equitans</i> Kin4-M       |                                                       | 490,885                                       | Nanoarchaeota    | Nanoarchaea         |              |
| <i>Pyrobaculum aerophilum</i> IM2         |                                                       | 2,222,430                                     | Crenarchaeota    | Thermoprotei        |              |
| <i>Pyrobaculum calidifontis</i> JCM 11548 |                                                       | 2,009,313                                     | Crenarchaeota    | Thermoprotei        |              |
| <i>Pyrococcus horikoshii</i> OT3          |                                                       | 1,738,505                                     | Euryarchaeota    | Thermococci         |              |
| <i>Sulfolobus tokodaii</i> 7(S311)        | 2,694,756                                             | Crenarchaeota                                 | Thermoprotei     |                     |              |

**Suppl. Tab. 1.** Biological composition of the even and uneven mock-communities used for this study.
