# Supplementary material for: Swarm: robust and fast clustering method for amplicon-based studies
Source: PeerJ journal article supplement (doi:10.7717/peerj.593), 2014-09-25
Supplement: Supplementary_Table2.pdf [file Supplementary_Table2.pdf]

| Divergence | Metric                     | Clustering algorithm |              |              |                            |                         |
|------------|----------------------------|----------------------|--------------|--------------|----------------------------|-------------------------|
|            |                            | CD-HIT-454           | DNAclust     | Swarm        | Usearch<br>(no presorting) | Usearch<br>(presorting) |
| 1          | <i>adjusted Rand index</i> | 0.916                | 0.883        | <b>0.958</b> | 0.780                      | 0.806                   |
| 2          |                            | 0.956                | 0.971        | <b>0.972</b> | 0.785                      | 0.846                   |
| 3          |                            | 0.943                | <b>0.979</b> | 0.977        | 0.802                      | 0.871                   |
| 4          |                            | 0.965                | 0.979        | <b>0.981</b> | 0.853                      | 0.946                   |
| 5          |                            | 0.967                | <b>0.984</b> | 0.983        | 0.913                      | 0.974                   |
| 6          |                            | 0.968                | <b>0.985</b> | <b>0.985</b> | 0.949                      | 0.984                   |
| 7          |                            | 0.968                | 0.980        | <b>0.985</b> | 0.972                      | 0.982                   |
| 8          |                            | 0.967                | 0.969        | <b>0.986</b> | 0.979                      | 0.981                   |
| 9          |                            | 0.965                | 0.969        | <b>0.983</b> | 0.979                      | 0.969                   |
| 10         |                            | 0.964                | 0.907        | <b>0.983</b> | 0.980                      | 0.957                   |
| 11         |                            | 0.955                | 0.921        | <b>0.983</b> | 0.979                      | 0.928                   |
| 12         |                            | 0.943                | 0.914        | <b>0.981</b> | 0.976                      | 0.901                   |
| 13         |                            | 0.937                | 0.914        | <b>0.981</b> | 0.970                      | 0.895                   |
| 14         |                            | 0.931                | 0.893        | <b>0.978</b> | 0.960                      | 0.875                   |
| 15         |                            | 0.897                | 0.870        | <b>0.977</b> | 0.942                      | 0.871                   |
| 16         |                            | 0.867                | 0.867        | <b>0.974</b> | 0.929                      | 0.867                   |
| 17         |                            | 0.854                | 0.852        | <b>0.978</b> | 0.916                      | 0.819                   |
| 18         |                            | 0.852                | 0.831        | <b>0.976</b> | 0.907                      | 0.806                   |
| 19         |                            | 0.861                | 0.622        | <b>0.958</b> | 0.898                      | 0.780                   |
| 20         |                            | 0.739                | 0.554        | <b>0.973</b> | 0.881                      | 0.769                   |
| 1          | <i>precision</i>           | 0.993                | 0.993        | 0.992        | <b>0.999</b>               | 0.996                   |
| 2          |                            | 0.992                | 0.992        | 0.992        | <b>0.999</b>               | 0.992                   |
| 3          |                            | 0.992                | 0.992        | 0.992        | <b>0.997</b>               | 0.993                   |
| 4          |                            | <b>0.992</b>         | <b>0.992</b> | <b>0.992</b> | <b>0.992</b>               | <b>0.992</b>            |
| 5          |                            | 0.992                | 0.992        | 0.992        | <b>0.996</b>               | 0.991                   |
| 6          |                            | 0.991                | 0.991        | <b>0.992</b> | 0.991                      | 0.991                   |
| 7          |                            | 0.991                | 0.986        | <b>0.992</b> | 0.991                      | 0.986                   |
| 8          |                            | 0.987                | 0.972        | <b>0.992</b> | 0.990                      | 0.983                   |
| 9          |                            | 0.980                | 0.971        | <b>0.990</b> | <b>0.990</b>               | 0.970                   |
| 10         |                            | 0.979                | 0.932        | <b>0.990</b> | <b>0.990</b>               | 0.963                   |
| 11         |                            | 0.978                | 0.932        | <b>0.990</b> | 0.985                      | 0.940                   |
| 12         |                            | 0.964                | 0.931        | <b>0.989</b> | 0.981                      | 0.927                   |
| 13         |                            | 0.954                | 0.930        | <b>0.987</b> | 0.976                      | 0.918                   |
| 14         |                            | 0.948                | 0.914        | <b>0.985</b> | 0.965                      | 0.907                   |
| 15         |                            | 0.932                | 0.901        | <b>0.983</b> | 0.958                      | 0.899                   |
| 16         |                            | 0.918                | 0.898        | <b>0.982</b> | 0.942                      | 0.893                   |
| 17         |                            | 0.899                | 0.880        | <b>0.981</b> | 0.931                      | 0.875                   |
| 18         |                            | 0.897                | 0.871        | <b>0.980</b> | 0.924                      | 0.863                   |
| 19         |                            | 0.887                | 0.726        | <b>0.967</b> | 0.909                      | 0.841                   |
| 20         |                            | 0.803                | 0.644        | <b>0.978</b> | 0.897                      | 0.833                   |
| 1          | <i>recall</i>              | 0.900                | 0.883        | <b>0.949</b> | 0.778                      | 0.812                   |
| 2          |                            | 0.946                | 0.968        | <b>0.970</b> | 0.790                      | 0.860                   |
| 3          |                            | 0.940                | <b>0.981</b> | 0.976        | 0.816                      | 0.890                   |
| 4          |                            | 0.958                | <b>0.983</b> | 0.979        | 0.871                      | 0.953                   |
| 5          |                            | 0.960                | <b>0.986</b> | 0.981        | 0.924                      | 0.980                   |
| 6          |                            | 0.962                | <b>0.988</b> | 0.986        | 0.950                      | 0.987                   |
| 7          |                            | 0.962                | 0.986        | <b>0.987</b> | 0.971                      | 0.987                   |
| 8          |                            | 0.962                | 0.987        | <b>0.988</b> | 0.978                      | 0.987                   |
| 9          |                            | 0.959                | <b>0.988</b> | 0.987        | 0.979                      | 0.984                   |
| 10         |                            | 0.961                | 0.972        | <b>0.987</b> | 0.982                      | 0.979                   |
| 11         |                            | 0.961                | 0.987        | <b>0.988</b> | 0.985                      | 0.977                   |
| 12         |                            | 0.958                | <b>0.988</b> | 0.987        | 0.983                      | 0.972                   |
| 13         |                            | 0.958                | <b>0.988</b> | 0.985        | 0.982                      | 0.969                   |
| 14         |                            | 0.959                | <b>0.986</b> | 0.983        | 0.981                      | 0.969                   |
| 15         |                            | 0.956                | 0.986        | <b>0.987</b> | 0.980                      | 0.970                   |
| 16         |                            | 0.956                | <b>0.988</b> | 0.985        | 0.979                      | 0.972                   |
| 17         |                            | 0.957                | 0.981        | <b>0.988</b> | 0.978                      | 0.960                   |
| 18         |                            | 0.955                | 0.981        | <b>0.987</b> | 0.979                      | 0.959                   |
| 19         |                            | 0.952                | <b>0.981</b> | 0.972        | 0.980                      | 0.959                   |
| 20         |                            | 0.949                | 0.973        | <b>0.985</b> | 0.978                      | 0.958                   |

Suppl. Tab. 2. Uneven mock-community. Median values for Figure 2.
