# Supplementary material for: Swarm: robust and fast clustering method for amplicon-based studies
Source: PeerJ journal article supplement (doi:10.7717/peerj.593), 2014-09-25
Supplement: Supplementary_Table3.pdf [file Supplementary_Table3.pdf]

| Divergence | Metric                     | Clustering algorithm |              |              |                            |                         |
|------------|----------------------------|----------------------|--------------|--------------|----------------------------|-------------------------|
|            |                            | CD-HIT-454           | DNAclust     | Swarm        | Usearch<br>(no presorting) | Usearch<br>(presorting) |
| 1          | <i>adjusted Rand index</i> | 0.834                | 0.792        | <b>0.891</b> | 0.731                      | 0.765                   |
| 2          |                            | 0.914                | 0.930        | <b>0.942</b> | 0.734                      | 0.796                   |
| 3          |                            | 0.923                | <b>0.948</b> | <b>0.948</b> | 0.744                      | 0.817                   |
| 4          |                            | 0.928                | <b>0.961</b> | 0.952        | 0.777                      | 0.874                   |
| 5          |                            | 0.930                | <b>0.964</b> | 0.953        | 0.848                      | 0.931                   |
| 6          |                            | 0.931                | <b>0.965</b> | 0.955        | 0.868                      | 0.956                   |
| 7          |                            | 0.932                | 0.956        | <b>0.961</b> | 0.904                      | 0.955                   |
| 8          |                            | 0.921                | 0.926        | <b>0.958</b> | 0.946                      | 0.950                   |
| 9          |                            | 0.919                | 0.924        | 0.951        | <b>0.952</b>               | 0.936                   |
| 10         |                            | 0.917                | 0.836        | <b>0.960</b> | 0.954                      | 0.903                   |
| 11         |                            | 0.917                | 0.822        | <b>0.952</b> | 0.951                      | 0.855                   |
| 12         |                            | 0.908                | 0.818        | <b>0.950</b> | 0.945                      | 0.838                   |
| 13         |                            | 0.867                | 0.787        | <b>0.950</b> | 0.939                      | 0.831                   |
| 14         |                            | 0.859                | 0.780        | <b>0.954</b> | 0.931                      | 0.827                   |
| 15         |                            | 0.847                | 0.765        | <b>0.942</b> | 0.924                      | 0.820                   |
| 16         |                            | 0.836                | 0.711        | <b>0.935</b> | 0.906                      | 0.810                   |
| 17         |                            | 0.820                | 0.651        | <b>0.925</b> | 0.896                      | 0.774                   |
| 18         |                            | 0.794                | 0.583        | <b>0.941</b> | 0.875                      | 0.704                   |
| 19         |                            | 0.768                | 0.559        | <b>0.925</b> | 0.858                      | 0.668                   |
| 20         |                            | 0.758                | 0.511        | <b>0.925</b> | 0.835                      | 0.647                   |
| 1          | <i>precision</i>           | 0.992                | 0.994        | 0.989        | <b>0.999</b>               | 0.998                   |
| 2          |                            | 0.990                | 0.989        | 0.989        | <b>0.999</b>               | 0.997                   |
| 3          |                            | 0.989                | 0.989        | 0.989        | <b>0.997</b>               | 0.995                   |
| 4          |                            | 0.989                | 0.989        | 0.989        | <b>0.995</b>               | 0.992                   |
| 5          |                            | 0.988                | 0.988        | 0.988        | <b>0.996</b>               | 0.988                   |
| 6          |                            | 0.987                | 0.988        | 0.988        | <b>0.994</b>               | 0.987                   |
| 7          |                            | <b>0.987</b>         | 0.974        | <b>0.987</b> | <b>0.987</b>               | 0.975                   |
| 8          |                            | 0.970                | 0.932        | <b>0.987</b> | <b>0.987</b>               | 0.969                   |
| 9          |                            | 0.961                | 0.929        | 0.985        | <b>0.986</b>               | 0.950                   |
| 10         |                            | 0.959                | 0.887        | 0.985        | <b>0.986</b>               | 0.914                   |
| 11         |                            | 0.959                | 0.850        | 0.984        | <b>0.985</b>               | 0.891                   |
| 12         |                            | 0.946                | 0.837        | <b>0.983</b> | 0.982                      | 0.870                   |
| 13         |                            | 0.923                | 0.819        | <b>0.981</b> | 0.971                      | 0.861                   |
| 14         |                            | 0.916                | 0.809        | <b>0.981</b> | 0.962                      | 0.857                   |
| 15         |                            | 0.904                | 0.791        | <b>0.970</b> | 0.948                      | 0.846                   |
| 16         |                            | 0.888                | 0.769        | <b>0.964</b> | 0.929                      | 0.842                   |
| 17         |                            | 0.864                | 0.736        | <b>0.949</b> | 0.915                      | 0.809                   |
| 18         |                            | 0.852                | 0.667        | <b>0.967</b> | 0.897                      | 0.768                   |
| 19         |                            | 0.828                | 0.651        | <b>0.945</b> | 0.875                      | 0.729                   |
| 20         |                            | 0.816                | 0.630        | <b>0.944</b> | 0.858                      | 0.714                   |
| 1          | <i>recall</i>              | 0.817                | 0.805        | <b>0.900</b> | 0.729                      | 0.777                   |
| 2          |                            | 0.899                | 0.927        | <b>0.944</b> | 0.734                      | 0.809                   |
| 3          |                            | 0.909                | 0.949        | <b>0.951</b> | 0.749                      | 0.836                   |
| 4          |                            | 0.914                | <b>0.967</b> | 0.955        | 0.790                      | 0.891                   |
| 5          |                            | 0.916                | <b>0.970</b> | 0.957        | 0.855                      | 0.946                   |
| 6          |                            | 0.919                | <b>0.972</b> | 0.958        | 0.883                      | 0.966                   |
| 7          |                            | 0.921                | <b>0.971</b> | 0.968        | 0.912                      | 0.969                   |
| 8          |                            | 0.921                | <b>0.969</b> | 0.964        | 0.947                      | 0.965                   |
| 9          |                            | 0.924                | <b>0.970</b> | 0.960        | 0.954                      | 0.963                   |
| 10         |                            | 0.923                | 0.966        | <b>0.969</b> | 0.958                      | 0.958                   |
| 11         |                            | 0.927                | 0.962        | <b>0.963</b> | 0.958                      | 0.954                   |
| 12         |                            | 0.927                | <b>0.966</b> | 0.953        | 0.955                      | 0.951                   |
| 13         |                            | 0.926                | <b>0.968</b> | 0.962        | 0.955                      | 0.950                   |
| 14         |                            | 0.925                | <b>0.969</b> | 0.964        | 0.955                      | 0.950                   |
| 15         |                            | 0.922                | <b>0.966</b> | 0.956        | 0.955                      | 0.949                   |
| 16         |                            | 0.925                | <b>0.963</b> | 0.960        | 0.956                      | 0.949                   |
| 17         |                            | 0.923                | <b>0.963</b> | 0.947        | 0.956                      | 0.948                   |
| 18         |                            | 0.921                | 0.960        | <b>0.961</b> | 0.956                      | 0.943                   |
| 19         |                            | 0.919                | <b>0.967</b> | 0.961        | 0.956                      | 0.935                   |
| 20         |                            | 0.915                | 0.959        | <b>0.960</b> | 0.956                      | 0.935                   |

**Suppl. Tab. 3.** Even mock-community. Median values for Supplementary Figure 1.
